# Supplementary material for: Transmission of Zearalenone, Deoxynivalenol, and Their Derivatives from Sows to Piglets during Lactation
Source: PubMed Central journal article supplement (PMC7825292; doi:10.3390/toxins13010037), 2021-01-06
Supplement: toxins-13-00037-s001.pdf [file toxins-13-00037-s001.pdf]

# Supplementary Materials: Transmission of zearalenone, deoxynivalenol, and their derivatives from sows to piglets during lactation

Xandra Benthem de Grave, Janine Saltzmann, Julia Laurain, Maria A Rodriguez, Francesc Molist, Sven Dänicke and Regiane R Santos

**Table S1.** Composition (%) and calculated nutrient levels (g/kg) of the sows experimental diet.

| INGREDIENTS |                       |       |
|-------------|-----------------------|-------|
|             | Corn                  | 40.0  |
|             | Wheat                 | 12.1  |
|             | Sunflower seed meal   | 10.0  |
|             | Wheat middling's      | 7.24  |
|             | Soybean hulls         | 7.50  |
|             | Sugar beet pulp       | 5.00  |
|             | Molasses Cane         | 4.00  |
|             | Linseed               | 3.68  |
|             | Soybean meal          | 3.01  |
|             | Potato                | 2.23  |
|             | Palm oil              | 0.50  |
|             | Soybean oil           | 0.50  |
|             | Limestone             | 1.25  |
|             | Sodium bicarbonate    | 0.35  |
|             | Monocalcium phosphate | 0.86  |
|             | Salt                  | 0.21  |
|             | Lysine-HCL (L 79%)    | 0.32  |
|             | Threonine (L 98%)     | 0.24  |
|             | Methionine (DL 99%)   | 0.00  |
|             | Tryptophan (L 98%)    | 0.01  |
|             | Phytase Sow           | 0.10  |
|             | Premix Gestation      | 0.50  |
|             | Premix Lactation      | 0.40  |
| NUTRIENTS   |                       |       |
| g/Kg        | Moisture              | 122.1 |
| g/Kg        | Crude Protein         | 150.0 |
| g/Kg        | Ash                   | 58.8  |
| g/Kg        | Crude Fibre           | 70.4  |
| g/Kg        | Sugar                 | 51.9  |
| g/Kg        | Crude Fat             | 46.6  |
| g/Kg        | Starch                | 334.1 |
| MJ/kg       | NE                    | 2269  |
| g/Kg        | SID_LYSs              | 7.6   |
| g/Kg        | SID_METs              | 2.4   |
| g/Kg        | SID_M+Cs              | 4.4   |
| g/Kg        | Ca                    | 9.3   |
| g/Kg        | P                     | 5.7   |
| g/Kg        | Na                    | 2.1   |

|       |          |       |
|-------|----------|-------|
| g/Kg  | Cl       | 3.3   |
| g/Kg  | K        | 8.4   |
| meq   | dEB      | 213   |
| mg/kg | Cu       | 23.1  |
| mg/kg | Zn       | 139.6 |
|       | US ratio | 4.6   |
| g/Kg  | FCHO     | 160.0 |
| g/Kg  | iCHO     | 80.0  |
| g/Kg  | NSPs     | 226.4 |

---

**Table S2.** Composition (%) and calculated nutrient levels (g/kg) of the creep feed.

| Ingredients |                       | Creep feed |
|-------------|-----------------------|------------|
|             | Potato protein        | 1.30       |
|             | Barley                | 16.00      |
|             | Oat flakes            | 10.00      |
|             | Coconut oil           | 1.50       |
|             | Milk powder skimmed   | 2.50       |
|             | Soybean oil           | 1.75       |
|             | Sugar Feed grade      | 3.20       |
|             | Wheat                 | 18.62      |
|             | Wheat middling's      | 6.20       |
|             | Monocalcium phosphate | 1.26       |
|             | P start 2220 0,4%     | 0.40       |
|             | Whey powder sweet     | 10.00      |
|             | Salt                  | 0.33       |
|             | Prem. vitamin ad3e    | 0.10       |
|             | Premix Copper-pigs    | 1.74       |
|             | Maize expanded        | 13.33      |
|             | Soycomil (spc)        | 4.20       |
|             | Vitamins/trace-elem.  | 0.10       |
|             | Lysine-HCL (L 79%)    | 0.50       |
|             | Methionine (DL 99%)   | 0.14       |
|             | Threonine (L 98%)     | 0.16       |
|             | Tryptophane (L 98%)   | 0.05       |
|             | Wheat gluten meal     | 1.40       |
|             | Valine (L 99%)        | 0.03       |
|             | Sodium bicarbonate    | 0.10       |
|             | Fish oil              | 0.50       |
|             | Limestone             | 0.70       |
|             | Soya bean meal        | 3.90       |
| Nutrients   |                       |            |
| g/Kg        | Moisture              | 102.29     |
| g/Kg        | Crude protein         | 167.10     |
| g/Kg        | Ash                   | 53.95      |
| g/Kg        | Crude fibre           | 23.59      |
| g/Kg        | Sugar                 | 135.82     |
| g/Kg        | Fat                   | 65.42      |
| g/Kg        | Starch                | 342.70     |
| MJ/kg       | NE                    | 10.21      |
| g/Kg        | SID_LYSs              | 11.07      |
|             | SID met/SID lys       | 0.35       |
|             | SID m+c/SID lys       | 0.58       |
